# Supplementary material
Source: HighWire-hosted journal article supplement (https://erj.ersjournals.com/content/49/1/1601100)
Supplement: inline-supplementary-material-2 [file inline-supplementary-material-2.pdf]

## **Supplementary data**

### **List of trial investigators**

#### **Argentina**

Arias, Jorge Omar; Llapur, Conrado Juan; Medina, Andrea; Nogueira, Juan Facundo; Stok, Ana María; Vidaurreta, Santiago Manuel; Yañez, Anahí

#### **Australia**

Clements, Barry; Robinson, Philip

#### **Bulgaria**

Dachev, Svetoslav; Markova, Nina; Ratcheva, Roumianka

#### **Germany**

Behre, Ulrich; Ehl, Wolfgang; Eickmeier, Olaf; Freytag, Frank; Gappa, Monika; Hamelmann, Eckard; Schmidt, Olaf; Stock, Philippe

#### **Guatemala**

Grajeda Mariscal, Guillermo Stuardo; Gamboa Vásquez, Imelda Xiomara; Menéndez Barillas, Servet Danilo; Montiel Viesca, Francisco José

#### **Hungary**

Barkai, Laszlo; Gönczi, Ferenc; Kosa, Lajos; Laki, István; Nagy, Katalin; Szekely, Gyöngyi

#### **Israel**

Amirav, Israel; Mandelberg, Avigdor; Mei Zahav, Meir

#### **Latvia**

Ancane, Arija; Cirule, Ieva; Petersons, Aiva; Puzule, Sarmite; Vevere, Viktorija

## **Mexico**

Acuña Kaldman, Moisés; Chavarria-Martinez, Uriel; González Díaz, Sandra Nora; Ramirez Rivera, Alicia

## **Philippines**

Custodio, Val; Gonong, Joven Roque

## **Portugal**

Almeida Fonseca, João; Arrobas, Ana; Ferreira, Rosário; Leiria Pinto, Paula

## **South Africa**

Manjra, Ahmed; Vermeulen, Jan

## **Ukraine**

Besh, Lesya; Duka, Kateryna; Gyrina, Olga; Horlenko, Olesya; Kostromina, Viktoriia; Lyha, Olha; Mokiya-Serbina, Svitlana; Nedelska, Svitlana; Polyakov, Valentyn; Yablon, Olga

## **USA**

Bensch, George; Bernstein, Jonathan; Ford, Linda; Goldstein, Stanley; Harper III, Thomas; Matz, Jonathan; Nayak, Nicholas; Vandewalker, Mark

**TABLE S1** Reported concomitant medications during the 12-week treatment period

| <b>Concomitant medication, n (%)</b> | <b>Tiotropium Respimat®<br/>5 µg once daily<br/>(n=130)</b> | <b>Tiotropium Respimat®<br/>2.5 µg once daily<br/>(n=127)</b> | <b>Placebo Respimat®<br/>once daily<br/>(n=135)</b> | <b>Total<br/>(N=392)</b> |
|--------------------------------------|-------------------------------------------------------------|---------------------------------------------------------------|-----------------------------------------------------|--------------------------|
| Glucocorticosteroids                 | 130 (100)                                                   | 127 (100)                                                     | 135 (100)                                           | 392 (100)                |
| Inhaled                              | 130 (100)                                                   | 127 (100)                                                     | 135 (100)                                           | 392 (100)                |
| Intravenous/intramuscular            | 1 (0.8)                                                     | 0                                                             | 0                                                   | 1 (0.3)                  |
| Oral                                 | 3 (2.3)                                                     | 1 (0.8)                                                       | 2 (1.5)                                             | 6 (1.5)                  |
| Intranasal                           | 25 (19.2)                                                   | 31 (24.4)                                                     | 34 (25.2)                                           | 90 (23.0)                |
| Other                                | 2 (1.5)                                                     | 2 (1.6)                                                       | 4 (3.0)                                             | 8 (2.0)                  |
| Use of anticholinergics              | 1 (0.8)                                                     | 0                                                             | 0                                                   | 1 (0.3)                  |
| Long-acting                          | 0                                                           | 0                                                             | 0                                                   | 0                        |
| Short-acting                         | 1 (0.8)                                                     | 0                                                             | 0                                                   | 1 (0.3)                  |
| β <sub>2</sub> -agonists             | 108 (83.1)                                                  | 102 (80.3)                                                    | 116 (85.9)                                          | 326 (83.2)               |
| Long-acting                          | 107 (82.3)                                                  | 101 (79.5)                                                    | 116 (85.9)                                          | 324 (82.7)               |
| Short-acting                         | 4 (3.1)                                                     | 3 (2.4)                                                       | 0                                                   | 7 (1.8)                  |
| Theophyllines                        | 8 (6.2)                                                     | 6 (4.7)                                                       | 7 (5.2)                                             | 21 (5.4)                 |
| Leukotriene modifiers                | 102 (78.5)                                                  | 104 (81.9)                                                    | 109 (80.7)                                          | 315 (80.4)               |

Treated set.

**TABLE S2** *Post hoc* analysis of peak FEV<sub>1(0-3h)</sub> response at Week 12 by age group

| Treatment                                     | Adjusted mean response ± SE | Active versus placebo Respimat®  |          |         |
|-----------------------------------------------|-----------------------------|----------------------------------|----------|---------|
|                                               |                             | Adjusted mean of difference ± SE | 95% CI   | p value |
| 12–14 years                                   |                             |                                  |          |         |
| Tiotropium Respimat® 5 µg once daily (n=71)   | 523 ± 46                    | 95 ± 65                          | –33–223  | 0.146   |
| Tiotropium Respimat® 2.5 µg once daily (n=65) | 606 ± 48                    | 179 ± 66                         | 48–309   | 0.007   |
| Placebo Respimat® once daily (n=72)           | 427 ± 46                    |                                  |          |         |
| 15–17 years                                   |                             |                                  |          |         |
| Tiotropium Respimat® 5 µg once daily (n=59)   | 695 ± 67                    | 106 ± 94                         | –79–292  | 0.261   |
| Tiotropium Respimat® 2.5 µg once daily (n=61) | 628 ± 66                    | 39 ± 94                          | –146–224 | 0.678   |
| Placebo Respimat® once daily (n=60)           | 589 ± 66                    |                                  |          |         |

Full analysis set. Adjusted for treatment, visit, baseline, treatment-by-visit interaction and baseline-by-visit interaction. Subgroup baseline mean FEV<sub>1</sub>, mL:

2301 for 12–14 years; 2785 for 15–17 years. Treatment-by-subgroup interaction p value = 0.656.

CI: confidence interval; FEV<sub>1</sub>: forced expiratory volume in 1 s; peak FEV<sub>1(0-3h)</sub>: peak forced expiratory volume in 1 s within 3 h post-dosing; SE: standard error.

**TABLE S3** *Post hoc* analysis of trough FEV<sub>1</sub> response at Week 12 by age group

| Treatment                                     | Adjusted mean response ± SE | Active versus placebo Respimat®  |          |         |  |
|-----------------------------------------------|-----------------------------|----------------------------------|----------|---------|--|
|                                               |                             | Adjusted mean of difference ± SE | 95% CI   | p value |  |
| 12–14 years                                   |                             |                                  |          |         |  |
| Tiotropium Respimat® 5 µg once daily (n=71)   | 302 ± 50                    | 57 ± 70                          | –80–195  | 0.413   |  |
| Tiotropium Respimat® 2.5 µg once daily (n=65) | 414 ± 52                    | 169 ± 71                         | 29–309   | 0.018   |  |
| Placebo Respimat® once daily (n=72)           | 244 ± 49                    |                                  |          |         |  |
| 15–17 years                                   |                             |                                  |          |         |  |
| Tiotropium Respimat® 5 µg once daily (n=59)   | 438 ± 71                    | 67 ± 100                         | –129–264 | 0.501   |  |
| Tiotropium Respimat® 2.5 µg once daily (n=61) | 426 ± 70                    | 55 ± 99                          | –140–251 | 0.576   |  |
| Placebo Respimat® once daily (n=60)           | 370 ± 70                    |                                  |          |         |  |

Full analysis set. Adjusted for treatment, visit, baseline, treatment-by-visit interaction and baseline-by-visit interaction. Subgroup baseline mean FEV<sub>1</sub>, mL:

2301 for 12–14 years; 2785 for 15–17 years. Treatment-by-subgroup interaction p value = 0.484.

CI: confidence interval; FEV<sub>1</sub>: forced expiratory volume in 1 s; SE: standard error.

**TABLE S4** Change from baseline in weekly mean rescue medication use at Week 12: weekly mean number of puffs of rescue medication during the daytime, night-time and full 24-hour period

| Treatment and parameter                                         | Adjusted mean response $\pm$ SE | Active versus placebo Respimat <sup>®</sup> |              |         |
|-----------------------------------------------------------------|---------------------------------|---------------------------------------------|--------------|---------|
|                                                                 |                                 | Adjusted mean of difference $\pm$ SE, mL    | 95% CI       | p value |
| Daytime, number of puffs                                        |                                 |                                             |              |         |
| Tiotropium Respimat <sup>®</sup> 5 $\mu$ g once daily (n=130)   | -0.312 $\pm$ 0.073              | -0.049 $\pm$ 0.093                          | -0.232–0.133 | 0.595   |
| Tiotropium Respimat <sup>®</sup> 2.5 $\mu$ g once daily (n=124) | -0.295 $\pm$ 0.075              | -0.032 $\pm$ 0.094                          | -0.217–0.153 | 0.731   |
| Placebo Respimat <sup>®</sup> once daily (n=131)                | -0.262 $\pm$ 0.073              |                                             |              |         |
| Night-time, number of puffs                                     |                                 |                                             |              |         |
| Tiotropium Respimat <sup>®</sup> 5 $\mu$ g once daily (n=129)   | -0.159 $\pm$ 0.065              | 0.021 $\pm$ 0.082                           | -0.140–0.182 | 0.795   |
| Tiotropium Respimat <sup>®</sup> 2.5 $\mu$ g once daily (n=124) | -0.092 $\pm$ 0.066              | 0.089 $\pm$ 0.083                           | -0.074–0.252 | 0.284   |
| Placebo Respimat <sup>®</sup> once daily (n=131)                | -0.180 $\pm$ 0.064              |                                             |              |         |
| 24-hour period, number of puffs                                 |                                 |                                             |              |         |

|                                                               |                |                |              |       |
|---------------------------------------------------------------|----------------|----------------|--------------|-------|
| Tiotropium Respimat <sup>®</sup> 5 µg once daily<br>(n=130)   | -0.540 ± 0.120 | -0.058 ± 0.151 | -0.355-0.239 | 0.703 |
| Tiotropium Respimat <sup>®</sup> 2.5 µg once daily<br>(n=124) | -0.483 ± 0.122 | -0.001 ± 0.153 | -0.301-0.300 | 0.996 |
| Placebo Respimat <sup>®</sup> once daily<br>(n=131)           | -0.482 ± 0.118 |                |              |       |

---

Full analysis set. Adjusted for treatment, week, baseline, treatment-by-week interaction and baseline-by-week interaction. Common baseline mean ± standard deviation: daytime = 0.972 ± 1.100; night-time = 0.749 ± 0.934; 24-hour period = 1.649 ± 1.906.

CI: confidence interval; SE: standard error.
